# Supplementary material for: Ammonium fluoride induced barrier-free and oxygen vacancy enhanced LLZO powder for fast interfacial lithium-ion transport in composite solid electrolytes
Source: Royal Society of Chemistry journal article supplement (doi:10.1039/d3ta03195k), 2023-01-01
Supplement: d3ta03195k1.pdf [file d3ta03195k1.pdf]

## Electronic Supplementary Information

# Ammonium fluoride induced barrier-free and oxygen vacancies enhanced LLZO powder for fast interfacial lithium-ion transport in composite solid electrolytes

Ziwen Pan,<sup>a</sup> Shiyu Cao,<sup>a</sup> Xinqi Lu,<sup>a</sup> Gang Zhang,<sup>a</sup> Qiang Shen,<sup>a</sup> Chong Mao,<sup>b</sup> Xiaobing Dai<sup>b</sup> and Fei Chen<sup>\*a, c, d</sup>

---

<sup>a</sup> State Key Laboratory of Advanced Technology for Materials Synthesis and Processing, Wuhan University of Technology, Wuhan 430070, China.

<sup>b</sup> Zhuhai Smoothway Electronic Materials Co., Ltd, Zhuhai 519110, China.

<sup>c</sup> Hubei Longzhong Laboratory, Wuhan University of Technology Xiangyang Demonstration Zone, Xiangyang 441000, China.

<sup>d</sup> International School of Materials Science and Engineering, Wuhan University of Technology, Wuhan 430070, China.

\*Corresponding author.

E-mail address: [chenfei027@whut.edu.cn](mailto:chenfei027@whut.edu.cn)

## Additional Figures

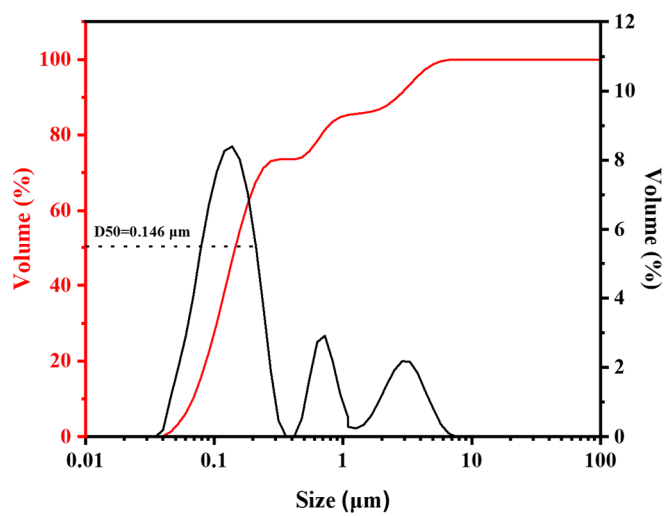

Figure S1. Particle size distribution curve of pristine LLZO powder

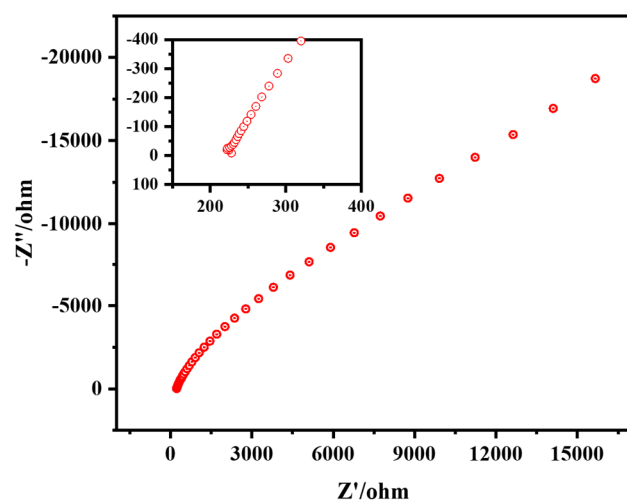

Figure S2. Nyquist plot of  $\text{Li}_{6.4}\text{Ga}_{0.2}\text{La}_3\text{Z}_2\text{O}_{12}$  pellet

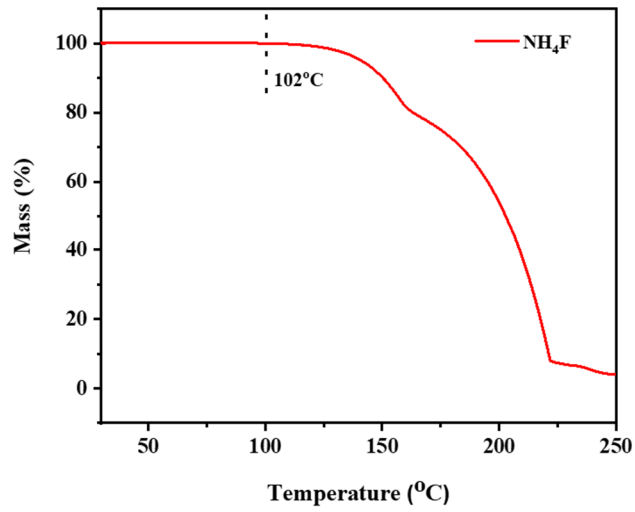

Figure S3. TG curve of  $\text{NH}_4\text{F}$  powder

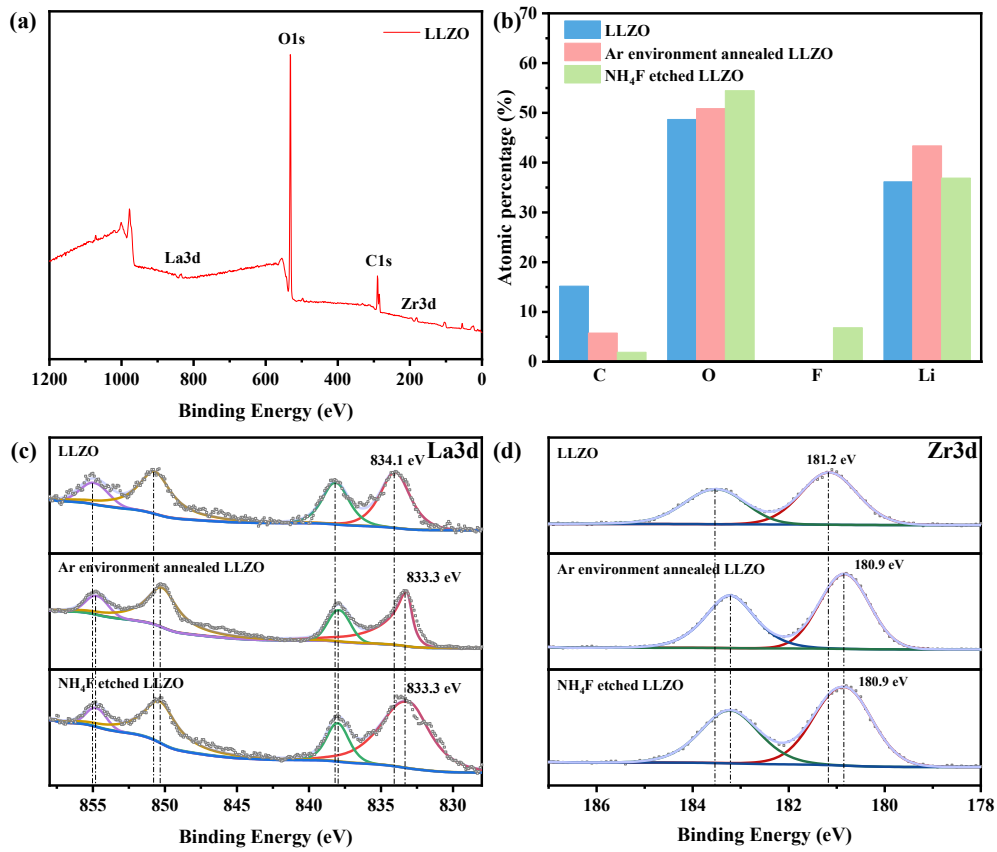

Figure S4. (a) XPS spectra of pristine LLZO powder. Surface elements contents (b); La 3d spectra (c); Zr 3d spectra (d) of LLZO, Ar environment annealed LLZO and  $\text{NH}_4\text{F}$  etched LLZO powder that detected by XPS.

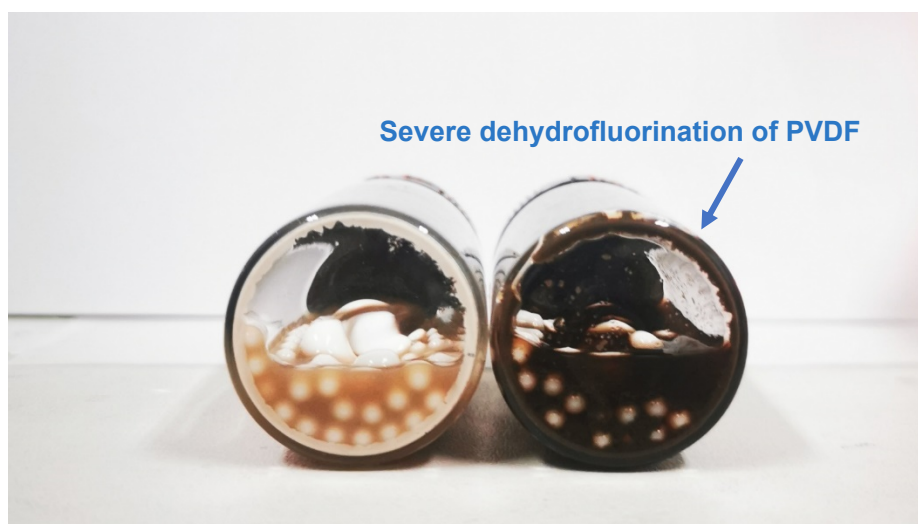

Figure S5. Optical photograph of PVDF-LiTFSI-NH<sub>4</sub>F etched LLZO, PVDF-LiTFSI-LLZO.

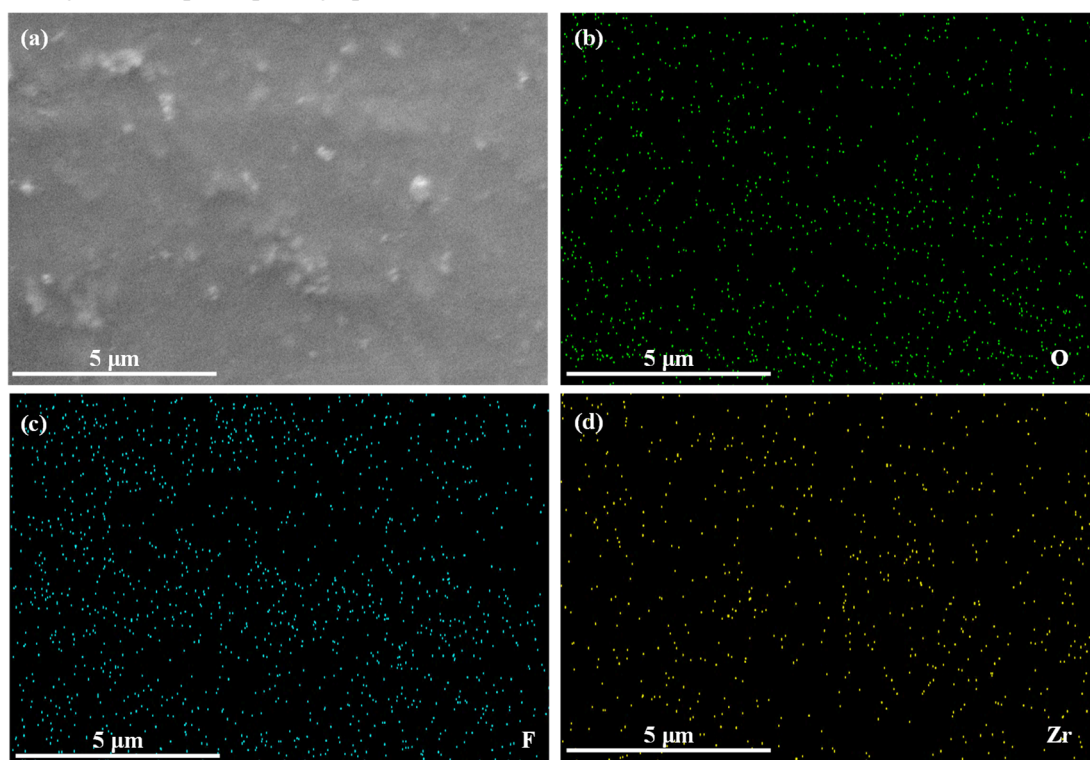

Figure S6. Morphologies of PEO-LiTFSI-LLZO membrane (a) were captured by SEM. The distribution of O, F and Zr respectively on surface of PEO-LiTFSI-LLZO membrane (b)-(d) were detected by EDX mapping.

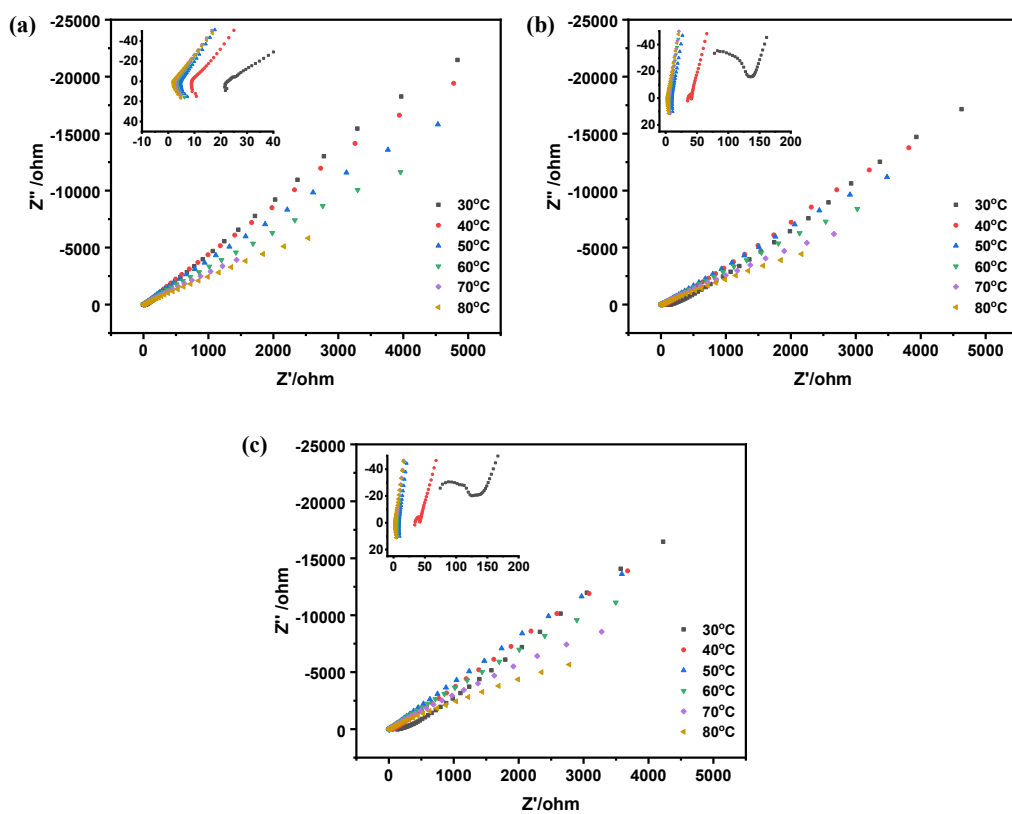

Figure S7. Nyquist plots of PEO-LiTFSI-NH<sub>4</sub>F etched LLZO (a); PEO-LiTFSI-LLZO (b); PEO-LiTFSI (c) membranes.

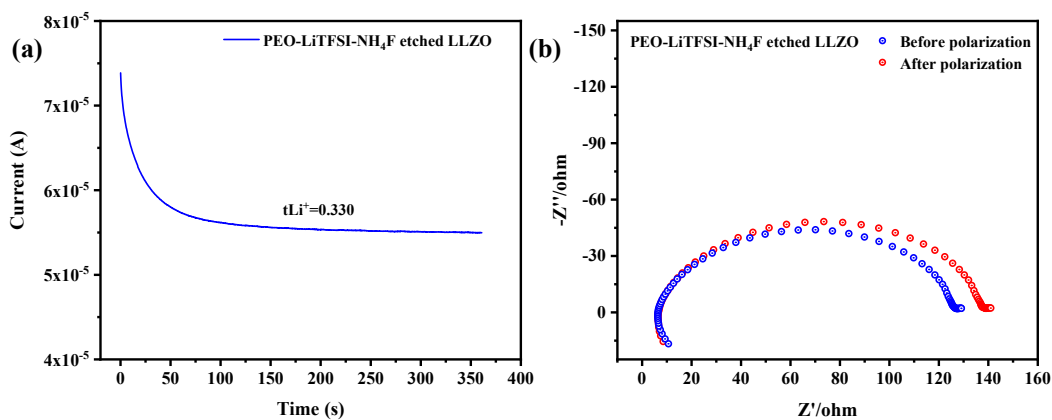

Figure S8. Detailed lithium-ion transference number data of PEO-LiTFSI-NH<sub>4</sub>F etched LLZO membrane

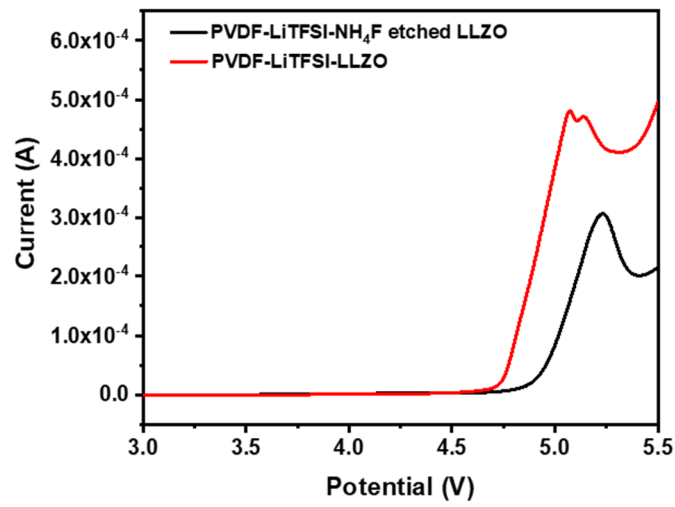

Figure S9. LSV curves of PVDF-LiTFSI-NH<sub>4</sub>F etched LLZO and PVDF-LiTFSI-LLZO

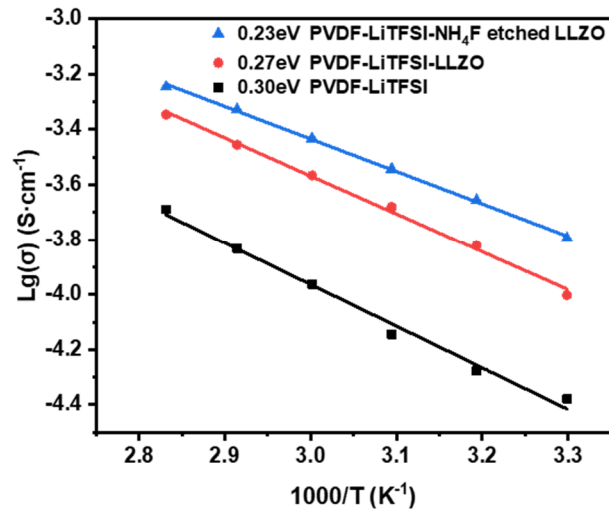

Figure S10. Arrhenius plots of PVDF-LiTFSI-NH<sub>4</sub>F etched LLZO, PVDF-LiTFSI-LLZO and PVDF-LiTFSI.

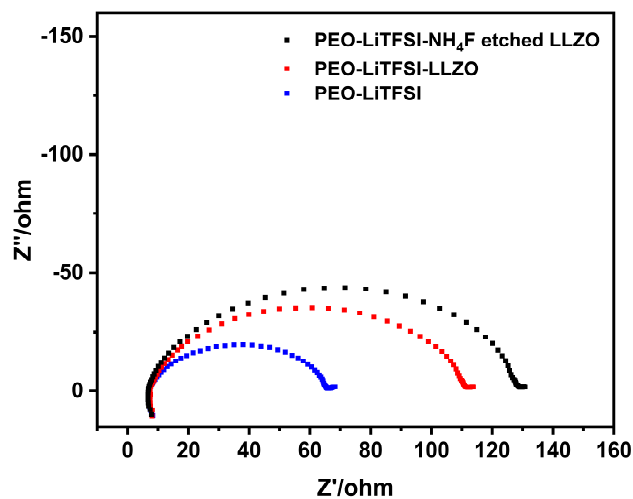

Figure S11. EIS spectra of Li symmetric cells with PEO-LiTFSI, PEO-LiTFSI-LLZO, and PEO-LiTFSI-NH<sub>4</sub>F etched LLZO membranes

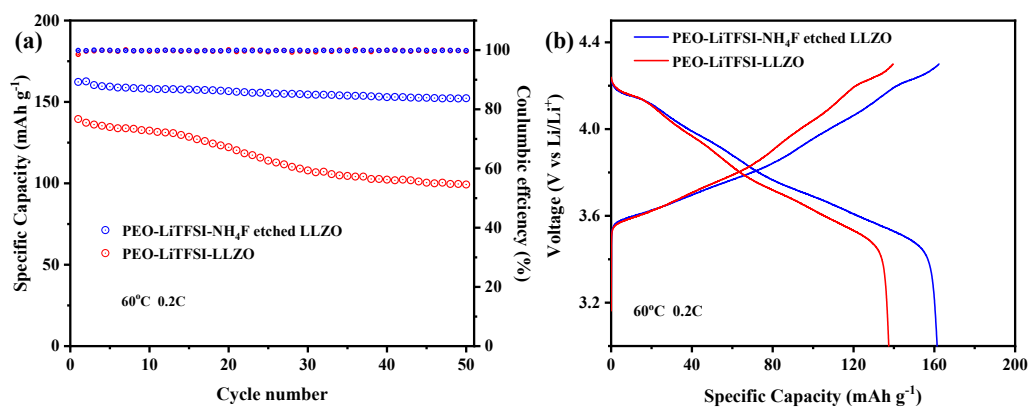

Figure S12. a) Cycling performance of different electrolytes coupled with NCM811 cathode and lithium metal anode at 0.2 C and b) corresponding voltage curves at first cycle.

### Additional Table

**Table S1.** Ionic conductivity of PEO-LiTFSI, PEO-LiTFSI-LLZO and PEO-LiTFSI-NH<sub>4</sub>F etched LLZO membranes under different temperatures.

| Electrolytes                             | Ionic conductivity ( $10^{-4}$ S cm <sup>-1</sup> ) at different temperature (°C) |       |      |      |      |      |
|------------------------------------------|-----------------------------------------------------------------------------------|-------|------|------|------|------|
|                                          | 30                                                                                | 40    | 50   | 60   | 70   | 80   |
| PEO-LiTFSI-NH <sub>4</sub> F etched LLZO | 1.93                                                                              | 4.88  | 9.10 | 12.8 | 16.7 | 21.7 |
| PEO-LiTFSI-LLZO                          | 0.279                                                                             | 0.885 | 3.69 | 6.45 | 8.66 | 12.2 |
| PEO-LiTFSI                               | 0.335                                                                             | 1.02  | 5.05 | 8.50 | 12.0 | 18.2 |

### Additional Experiment section

#### *Preparation of PVDF matrix composite solid electrolytes:*

LiTFSI (Aladdin, 99.95%), and PVDF (Arkema, Kynar 761) were dried under vacuum at 80 °C for 24 h before use. PVDF solid electrolyte membranes were prepared via solution-casting method. PVDF and LiTFSI were dissolved in N, N-dimethylformamide (DMF) with weight ratio of 2:1 followed by ball-milling at 200 rpm for 3 h. After that, PVDF solid electrolytes solution was cast onto a Teflon mold ( $4 \times 4$  cm<sup>2</sup>) and then dried at 60°C for 24-36 h to evaporate solvent. PVDF-LLZO and PVDF-NH<sub>4</sub>F etched LLZO composite electrolytes were prepared by adding different amounts of inorganic electrolytes into PVDF solid electrolytes solution. Then the suspension was ball-milled at 200 rpm for 12 h to ensure the fine dispersion before casting.
